# Supplementary material for: PHYTOCHROME INTERACTING FACTORS PIF4 and PIF5 promote heat stress induced leaf senescence in Arabidopsis
Source: PubMed Central journal article supplement — J Exp Bot. 2021 Apr 8;72(12):4577–89. doi: 10.1093/jxb/erab158 (PMC8446286; doi:10.1093/jxb/erab158), 2021-04-08
Supplement: erab158_suppl_supplementary_figures_s1-s4_and_table-s1.pdf [file erab158_suppl_supplementary_figures_s1-s4_and_table-s1.pdf]

## Supplementary data

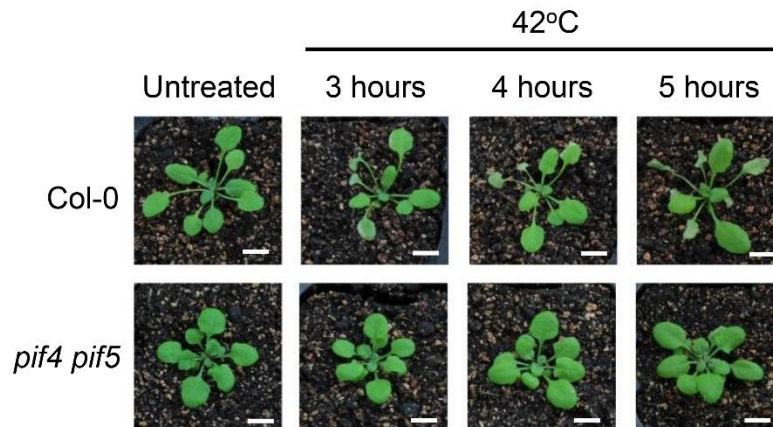

**Fig. S1. Exploration of experimental conditions for heat treatment.** Representative the 3-week-old Col-0 and *pif4-2 pif5-3* grown in soil under the 16h light/8h dark condition after heat treatment at 42 °C for 3, 4 and 5 hours respectively and untreated materials. Scale bar, 1 cm.

**A** Up-regulated genes in *pif4 pif5* heat vs Col-0 heat

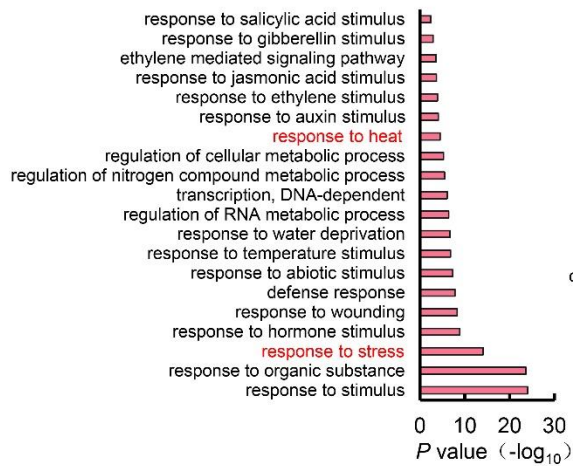

**B** Down-regulated genes in *pif4 pif5* heat vs Col-0 heat

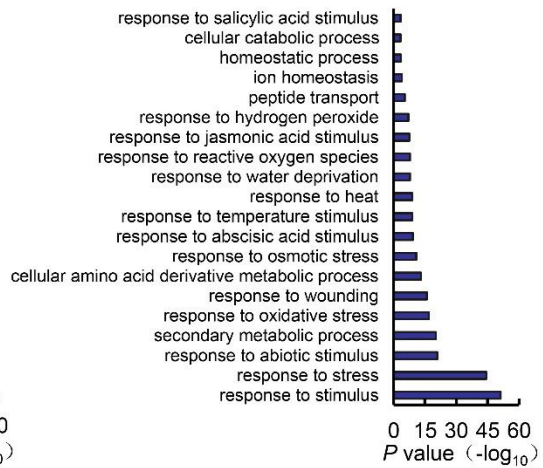

**Fig. S2. Analysis of down regulated DEGs in Col-0 after heat treatment.**

(A) Gene Ontology analysis of the up regulated genes between wild-type Col-0 and *pif4 pif5* mutant after heat treatment.

(B) Gene Ontology analysis of the down regulated genes between wild-type Col-0 and *pif4 pif5* mutant after heat treatment.

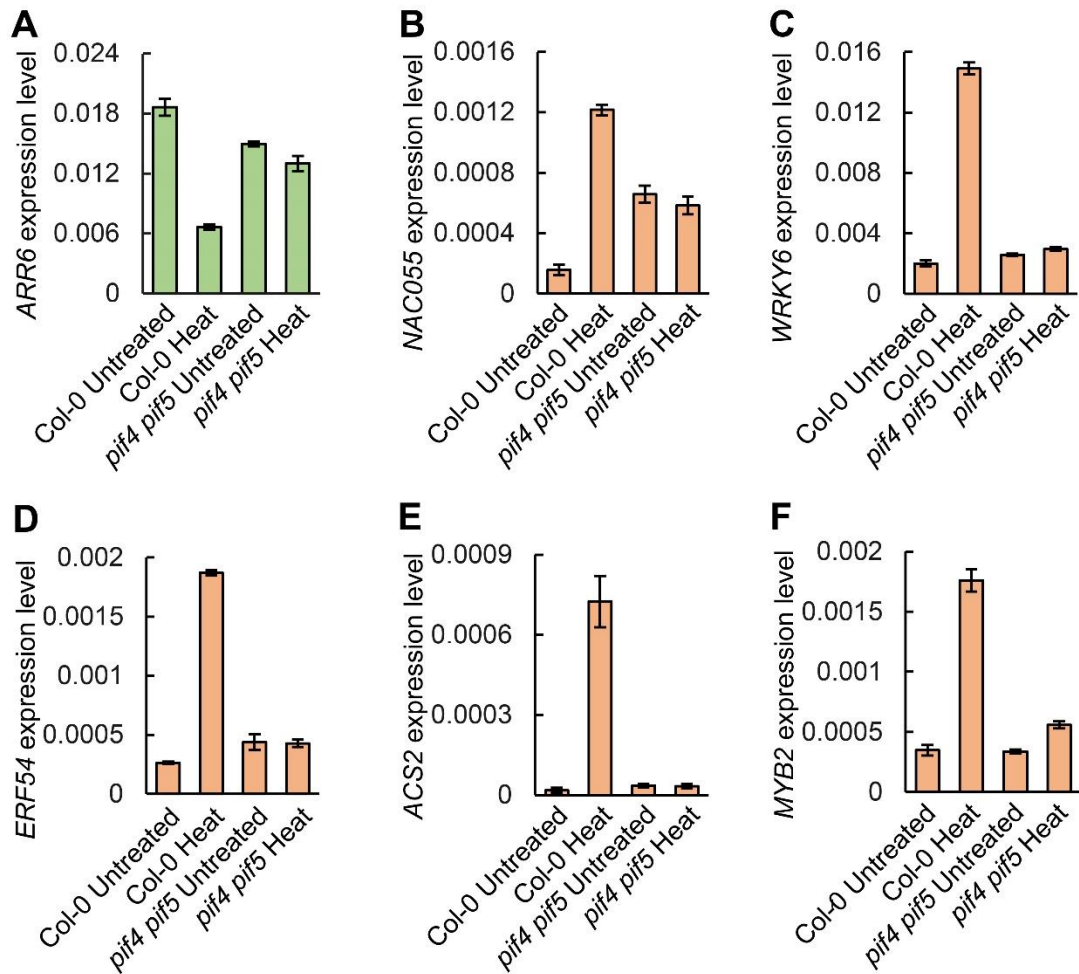

**Fig. S3. The transcript levels of senescence associated genes after heat stress induced senescence.**

(A-F) RT-qPCR analysis of *ARR6* (A), *NAC055* (B), *WRKY6* (C), *ERF54* (D), *ACS2* (E) and *MYB2* (F) in Col-0 and *pif4 pif5* of heat treatment and untreated group. 3-week-old wild-type Col-0 and *pif4 pif5* plants grown in soil under the 16h light/8h dark condition and were treated at 42 °C for 5 hours. The 3<sup>rd</sup> and 4<sup>th</sup> rosette leaves which began to turn yellow at the edge were collected for RNA extraction after 3 days of recovering growth. Three biological replicates were performed. Error bars represent SD.

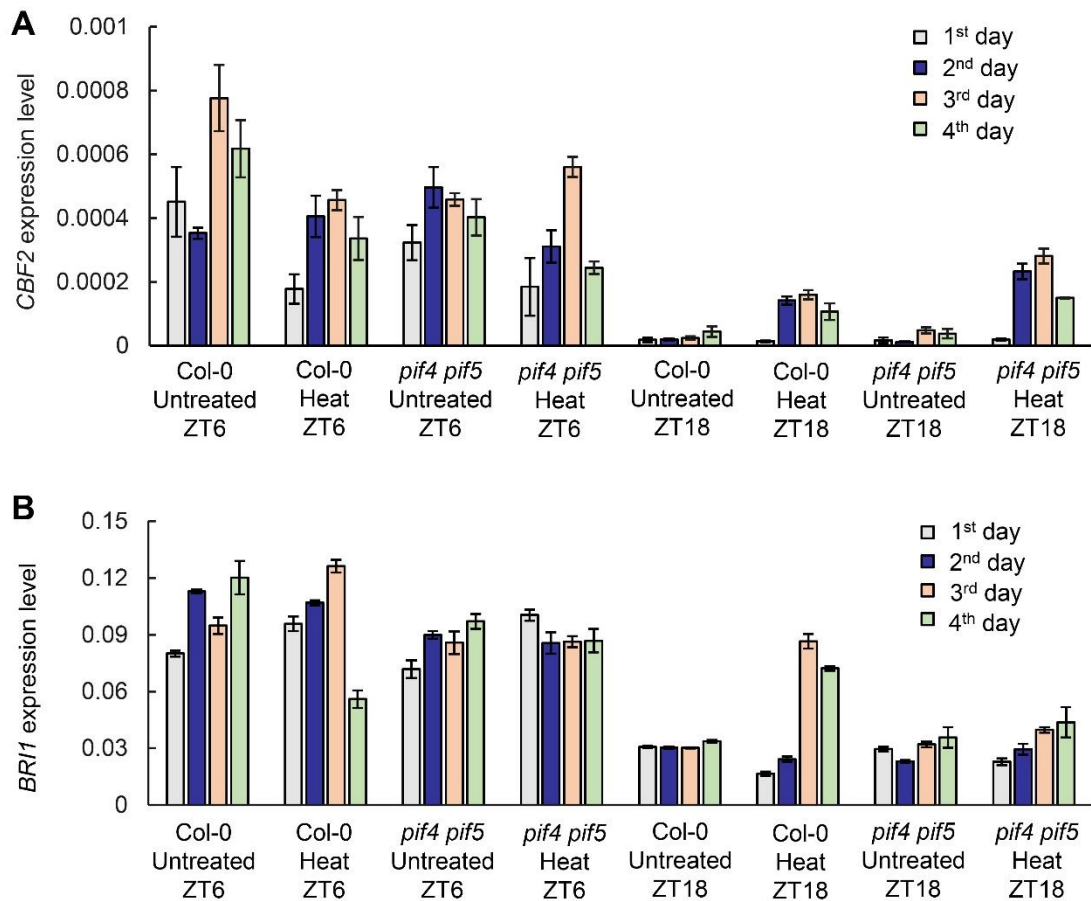

**Fig. S4. The change in transcript levels of *CBF2* and *BRI1* during heat stress induced senescence.**

(A-B) The changes in the transcriptional levels of *CBF2* (A) and *BRI1* (B) during heat stress induced senescence were determined by RT-qPCR. The 3<sup>rd</sup> and 4<sup>th</sup> leaves of the heat treated at 42°C for 2 hours and untreated 18-day-old Col-0 and *pif4 pif5* grown in MS with 3% Sucrose agar plate under the LD condition were collected immediately and at the same time points of the day over the next two days at ZT6 and ZT18, respectively. Three biological replicates were performed. Error bars represent SD.

**Table S1.** Primers used in this study.

| <b>Primer name</b>       | <b>Sequence</b>                                                    | <b>Experiment</b> |         |
|--------------------------|--------------------------------------------------------------------|-------------------|---------|
| <i>GST-PIF4-EcoR1-F</i>  | CCGCGTGGATCCCCGGAATTCATGGAACACC<br>AAGGTTGGAG                      | <i>GST-PIF4</i>   |         |
| <i>GST-PIF4-Xho1-R</i>   | GATGCGGCCGCTCGAGTCGACCTAGTGGTCC<br>AAACGAGAAC                      |                   |         |
| <i>NAC019-EMSA-G1-F</i>  | ATCACGACGATCTAACTGACACACGTGTCAG<br>AATTCAAAAGTGTTTATAGATAAACACAA   | EMSA assay        |         |
| <i>NAC019-EMSA-G1-R</i>  | TTGTGTTTATCTATAAACACTTTTGAATTCTGA<br>CACGTGTGTCAGTTAGATCGTCGTGAT   |                   |         |
| <i>NAC019-EMSA-G2-F</i>  | CATTTTCAGAAAACCCGTCAACAAAAAACACG<br>TGAAATAAAATATCTCTTCCTTTACCAGT  |                   |         |
| <i>NAC019-EMSA-G2-R</i>  | ACTGGTAAAGGAAGAGATATTTTATTTACGT<br>GTTTTTTGTTGACGGGTTTTCTGAAATG    |                   |         |
| <i>NAC019-EMSA-G34-F</i> | TTGCGCCTAACTTCTACGATAGACACGTGGAC<br>ACGTGTCGTCATGATGTAGTTTTGTCCG   |                   |         |
| <i>NAC019-EMSA-G34-R</i> | CGGACAAAACACTACATCATGACGACACGTGTC<br>CACGTGTCTATCGTAGAAGTTAGGCGCAA |                   |         |
| <i>IAA29-EMSA-G-F</i>    | GAGTAGTCACGCACGCACGACTCCGTTACAG<br>TGACATTCACGTTGATATTTCCCCCTCTA   |                   |         |
| <i>IAA29-EMSA-G-R</i>    | TAGAGGGGGAAATATCAACGTGAATGTCACG<br>TGAACGGAGTCGTGCGTGCGTACTACTC    |                   |         |
| <i>IAA29-EMSA-P-F</i>    | GATGTTGGATGTCTAAATTCGTTGAATCATGTG<br>TCTCTTGACGAAATATGCATCTTCTTA   |                   |         |
| <i>IAA29-EMSA-P-R</i>    | TAAGAAGATGCATATTTTCGTCAAGAGACACAT<br>GATTCAACGAATTTAGACATCCAACATC  |                   |         |
| <i>NAC019-q-F</i>        | TTTCTCTCTTCAGCTCATCG                                               |                   | RT-qPCR |
| <i>NAC019-q-R</i>        | ATTTTATCCGTACCCGTAGC                                               |                   |         |
| <i>IAA29-q-F</i>         | ACCGAATATGAAGATTGCGA                                               |                   |         |
| <i>IAA29-q-R</i>         | GATGAACAGATTCCGCAAAG                                               |                   |         |
| <i>SAG113-q-F</i>        | TGTGGAAGAAGACGTGAAAT                                               |                   |         |
| <i>SAG113-q-R</i>        | GCATCAGCTTCAAACCTCTC                                               |                   |         |
| <i>CBF2-q-F</i>          | GGAAGGAAGAAGTTTCGTGA                                               |                   |         |
| <i>CBF2-q-R</i>          | TTTCTTGTTGGCTCTCTCA                                                |                   |         |
| <i>BR11-q-F</i>          | AATTACCGGAATCTCTGACG                                               |                   |         |
| <i>BR11-q-R</i>          | TGTTCTGAAGGTAAAGCTCC                                               |                   |         |
| <i>PIF4-1222-R</i>       | GTTGTTGACTTTGCTGTCCCGC                                             |                   |         |
| <i>PIF4-1184-F</i>       | AGATGCAGCCGATGGAGATGTT                                             |                   |         |
| <i>PIF5-1246-R</i>       | CGCCGGAGATCCAAATCCCAACAT                                           |                   |         |
| <i>PIF5-1204-F</i>       | GCGGGAATCAGATGCAGACCGTG                                            |                   |         |
| <i>ARR6-q-F</i>          | CTTCAAAGTTTGGATCACCG                                               |                   |         |
| <i>ARR6-q-R</i>          | TTTCTCAACATCCAAACCA                                                |                   |         |
| <i>ARR5-q-F</i>          | TAGTTCGGTTGGATTTGAGG                                               |                   |         |

|                    |                       |  |
|--------------------|-----------------------|--|
| <i>ARR5</i> -q-R   | ATACGAGGCAAGATGTTCTC  |  |
| <i>WRKY6</i> -q-F  | CTCCGACAAGAAATCTAGGG  |  |
| <i>WRKY6</i> -q-R  | TTTTTCGCACGCTTATCTC   |  |
| <i>NYE2</i> -q-F   | GGAGTTGATGAGAAGAAGCA  |  |
| <i>NYE2</i> -q-R   | TTCGTCCCGGAACAATTTAT  |  |
| <i>ACS2</i> -q-F   | CTTGCAGAGAATCAGCTTTG  |  |
| <i>ACS2</i> -q-R   | AAAAGTCACTCTTCCACCTC  |  |
| <i>SAG29</i> -q-F  | TGTGTTGCCATTTCTGTTTC  |  |
| <i>SAG29</i> -q-R  | GCGCTTATAGTGAGGAAGAA  |  |
| <i>NAC055</i> -q-F | GGATTATGCATGAGTACCGT  |  |
| <i>NAC055</i> -q-R | CGACCACTCGTCATTAGATT  |  |
| <i>ERF54</i> -q-F  | TAACTTGGAGAGCAAGGAAC  |  |
| <i>ERF54</i> -q-R  | CCAAATCATCCCAAAGAGGA  |  |
| <i>MYB2</i> -q-F   | TCCTAGTCAACTTCGTCTCT  |  |
| <i>MYB2</i> -q-R   | CCTCTTCTAACATCTGGACG  |  |
| <i>ACT2</i> -F     | GCTGAGAGATTCAGATGCCCA |  |
| <i>ACT2</i> -R     | GTGGATTCCAGCAGCTTCCAT |  |
| <i>TUB4</i> -F     | AGGGAAACGAAGACAGCAAG  |  |
| <i>TUB4</i> -R     | GCTCGCTAATCCTACCTTTGG |  |
